# Supplementary material for: Tumor Acidosis Remodels the Glycocalyx to Control Lipid Scavenging and Ferroptosis
Source: Research Square preprint supplement (doi:10.21203/rs.3.rs-6992738/v1), 2025-07-11

## Glossary

| Tab                           | Description                                                                                                |
|-------------------------------|------------------------------------------------------------------------------------------------------------|
| Samples & Antibodies          | List of samples and antibodies used for CUT&RUN                                                            |
| Mapping & Peak Calling        | Summary of read mapping, peak calling, and FRiP (Fraction of Reads in Peaks) score.                        |
| Summary Pearson's Correlation | Pearson correlation coefficients for the indicated sample comparisons.                                     |
| Summary Consensus Peaks       | Summary of the number of significant consensus peaks identified per condition.                             |
| Browser visualization         | Visualization of HIF1 binding sites at some genes involved in proteoglycan and glycosaminoglycan pathways. |

**Antibodies for CUT&RUN**

| Target                  | Catalog Number                    | Lot No.  | Company      |
|-------------------------|-----------------------------------|----------|--------------|
| HIF1A                   | GTX127309                         | 44714    | GeneTex      |
| IgG (negative ctrl)     | 53180 (part of CUT&RUN assay kit) | 24115219 | Active Motif |
| H3K4me3 (positive ctrl) | 53180 (part of CUT&RUN assay kit) | 24115219 | Active Motif |

**Cell lines used**

| Sample Name | Description                        |
|-------------|------------------------------------|
| NA          | Non acidic - control for AA        |
| AA          | Acidic adapted                     |
| CtrlSF      | Control for DMOG- and TGFB-treated |
| DMOG        | DMOG-treated                       |
| TGFB        | TGFb-treated                       |

**Replicates**

|                 |
|-----------------|
| R1: Replicate 1 |
| R2: Replicate 2 |

CUT&RUN

Number of sequencing reads, mapped reads, called peaks and FRiP score

- sampleName

sample name with R1 and R2 ending denoting replicate 1 and 2
- total PE reads

Total sequencing read pairs obtained
- % mapping (hg38)

Percentage of total aligned reads recorded by Bowtie2 to GRCh38.p14 genome (Gencode v47)
- % mapping (dmel)

Percentage of total aligned reads recorded by Bowtie2 to dmel genome (Flybase: dmel\_r6.62\_FB2025\_01)  
calculated as the ratio of aligned reads to Drosophila melanopgaster in sample vs reads  
aligned to Drosophila melanogaster in IgG control, to scale genome coverage for hg38
- Scaling factor

alignment for peak calling with SEACR
- FRiP

Percentage of fraction of reads in Peaks assesed by Subread FeatureCounts
- Called Peaks

Number of significantly called peaks using SEACR with on scaled bedGraphs parameters: norm 0.01 stringent

| sampleName    | total PE reads | % mapping (hg38) | % mapping (dmel) | Scaling factor | FRiP  | CalledPeaks |
|---------------|----------------|------------------|------------------|----------------|-------|-------------|
| AA_HIF1A_R1   | 34 679 573     | 81,42            | 3,73             | 0,2            | 11,08 | 57779       |
| AA_HIF1A_R2   | 31 649 960     | 88,39            | 6,35             | 0,3            | 11,90 | 50337       |
| NA_HIF1A_R1   | 21 175 964     | 83,86            | 7,65             | 0,3            | 12,10 | 42708       |
| NA_HIF1A_R2   | 56 525 036     | 84,55            | 15,45            | 1,0            | 14,09 | 47917       |
| NA_IgG        | 25 421 838     | 72,25            | 24,07            | 1,0            |       |             |
| Ctrl_HIF1A_R1 | 21 188 863     | 64,79            | 10,69            | 1,0            | 11,74 | 36487       |
| Ctrl_HIF1A_R2 | 16 860 777     | 64,53            | 12,36            | 1,0            | 12,01 | 26928       |
| Ctrl_IgG      | 17 889 173     | 64,93            | 9,79             | 1,0            |       |             |
| Ctrl_H3K4me3  | 50 104 386     | 73,22            | 26,78            | 1,0            | 19,12 | 42706       |
| DMOG_HIF1A_R1 | 29 124 642     | 83,02            | 11,45            | 1,0            | 14,29 | 39586       |
| DMOG_HIF1A_R2 | 24 134 702     | 79,32            | 14,67            | 1,0            | 13,14 | 30878       |

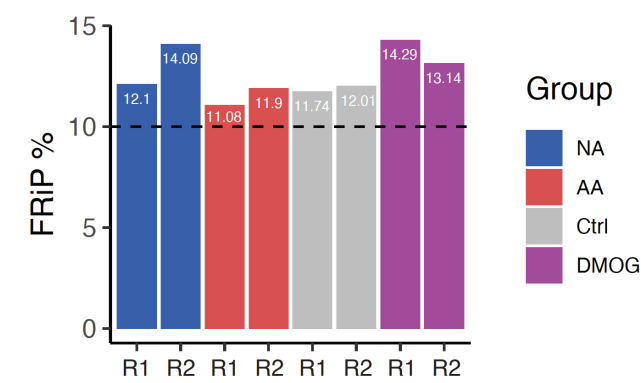

## Pearson's correlation analysis

Reads Per Genomic Content (RPGC)-normalized genome coverage files were scaled using a spike-in normalized scaling factor.

Pearson correlation coefficients were calculated for NA vs. AA samples (Fig. 2 N–Q) and Ctrl vs. DMOG (Fig. S5 J–N) using deepTools v3.5.5 over normalized, scaled signal genomic coverage.

The numbers in the boxes represent the correlation coefficients between the samples in the corresponding rows and columns. "\_R1" and "\_R2" denote replicates 1 and 2, respectively, for each comparison.

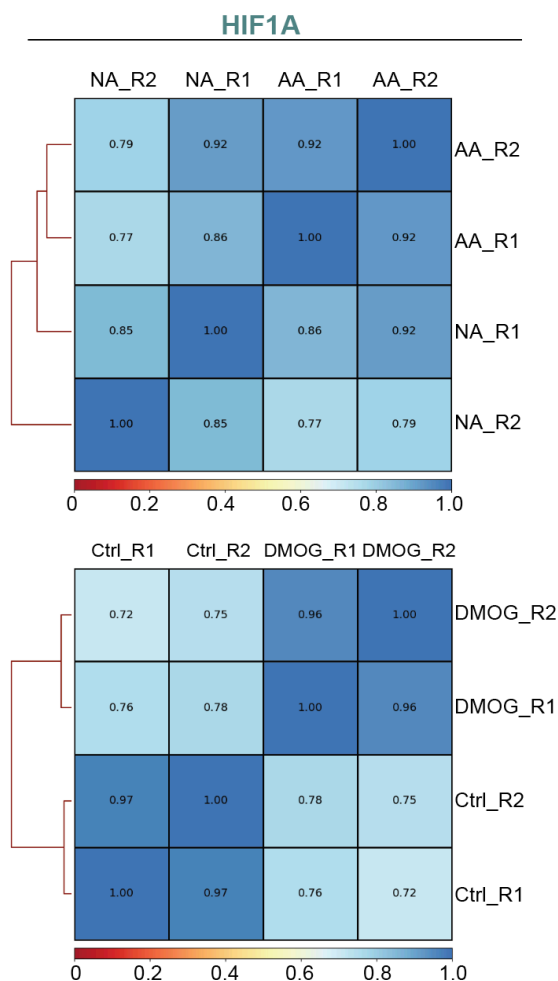

Consensus Peak analysis

sampleName      Name of the sample, with "\_R1" and "\_R2" indicating replicate 1 and replicate 2, respectively.  
Peaks called by SEACR (FDR 0.01) that are present in both replicates. Peaks were identified independently in each replicate using SEACR at FDR 0.01, and overlapping peaks between replicates were determined using the findOverlapOfPeaks function from the R package

consensus Peaks      ChIPpeakAnno (Bioconductor v3.20).

| sampleName    | consensus Peaks |
|---------------|-----------------|
| AA_HIF1A_R1   | 24116           |
| AA_HIF1A_R2   |                 |
| NA_HIF1A_R1   | 11076           |
| NA_HIF1A_R2   |                 |
| Ctrl_HIF1A_R1 | 8364            |
| Ctrl_HIF1A_R2 |                 |
| DMOG_HIF1A_R1 | 20683           |
| DMOG_HIF1A_R2 |                 |

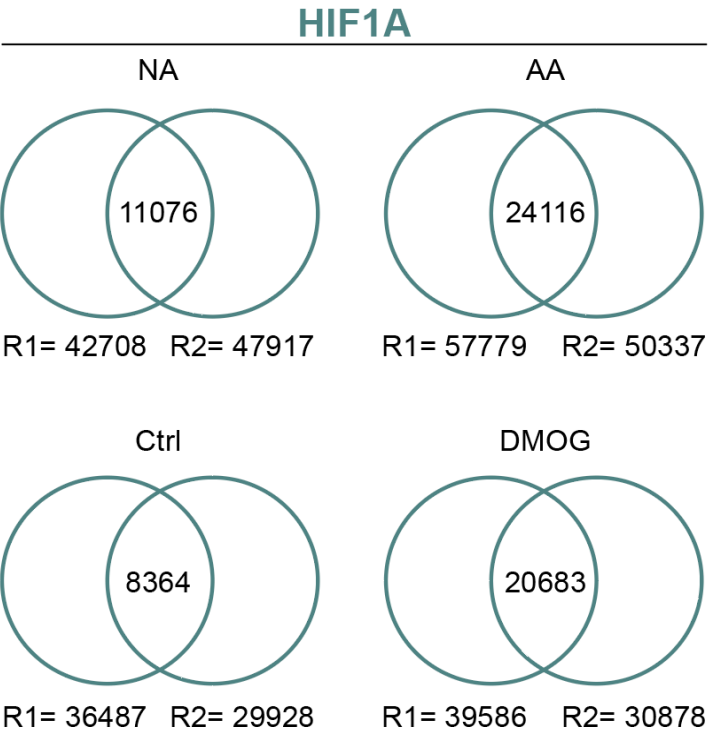

Browser view

A,B and C Visualization of HIF1 binding sites at the *GPC5* , *SULF2* , and *VCAN* loci under NA and AA conditions.

D,E, and F Visualization of HIF1 binding sites at the *DSE* , *DSEL* , and *EXT1* loci under Ctrl and DMOG conditions.

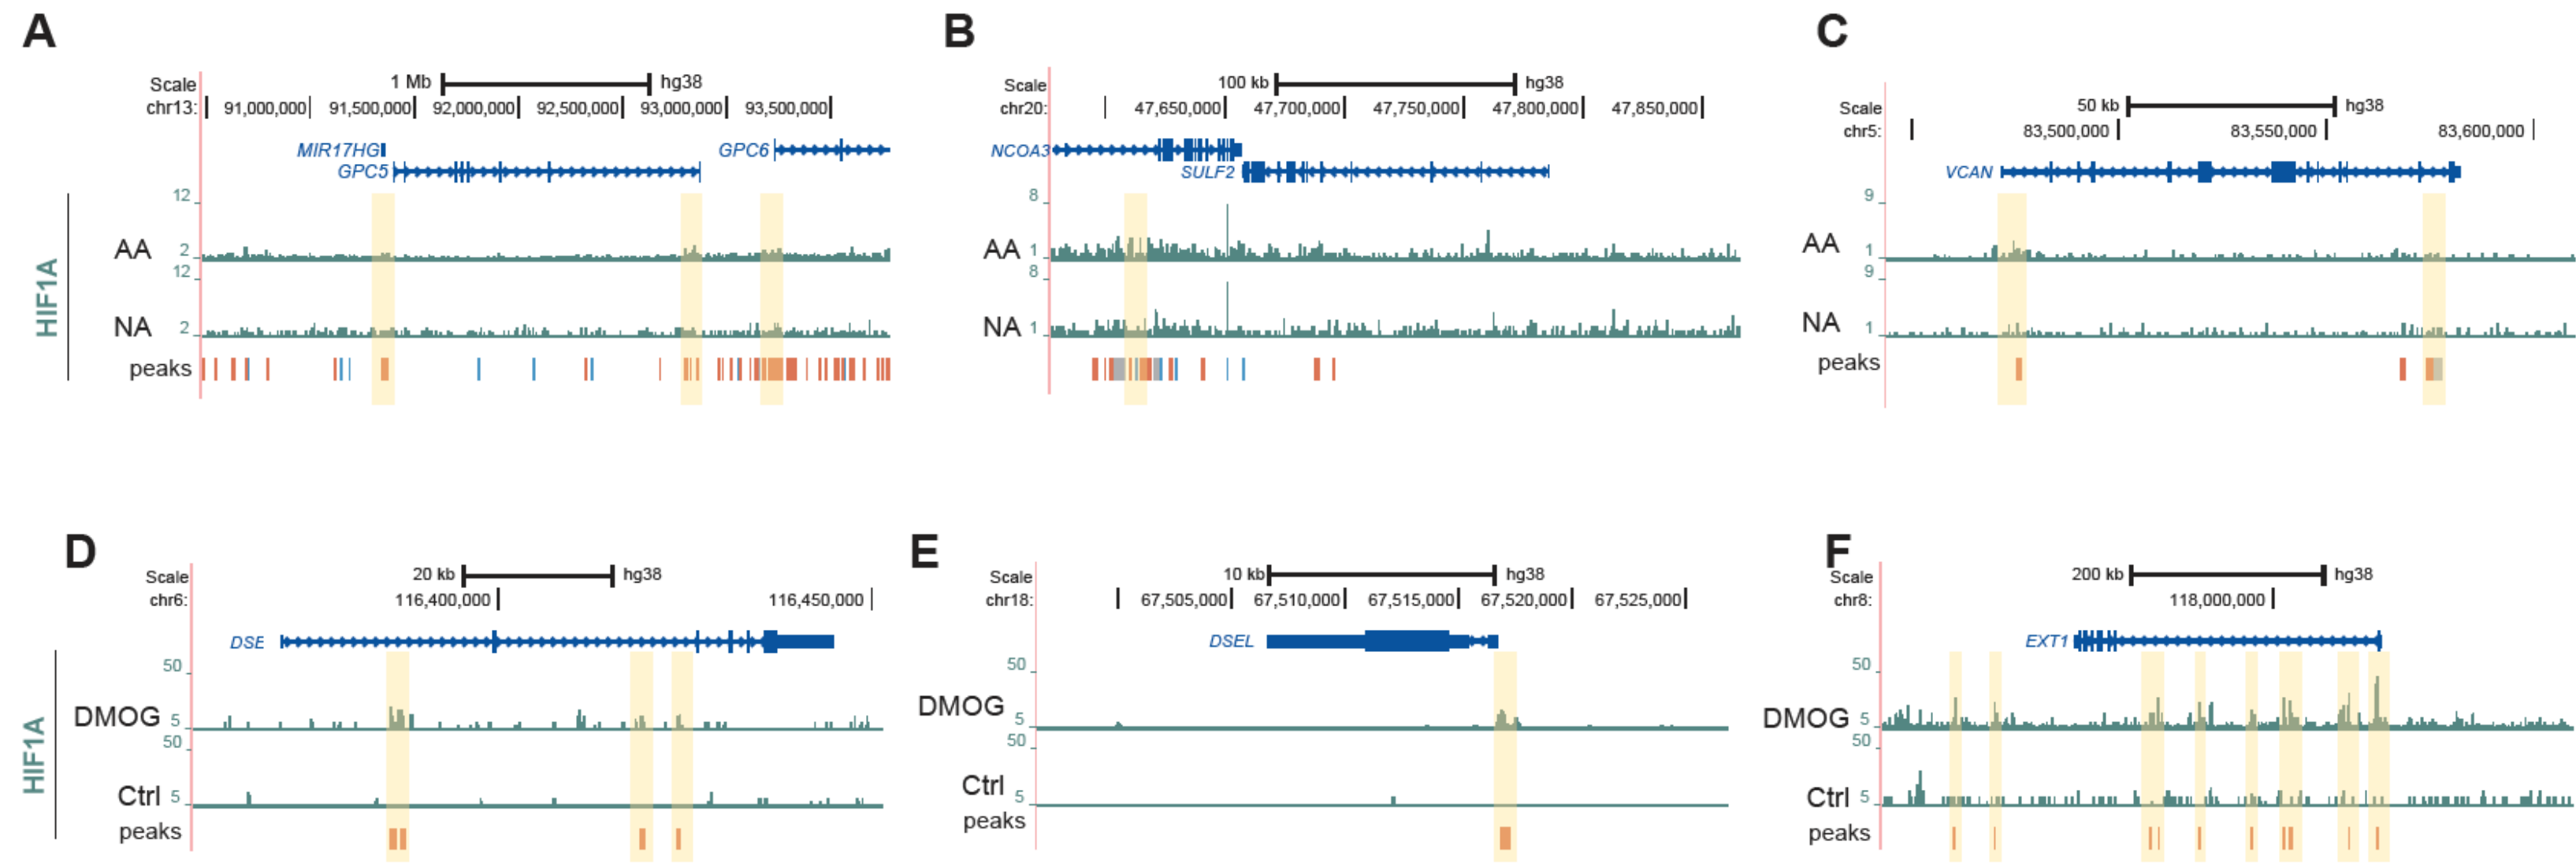

Supplement: Supplementary file 1 [file 76626cbac134e5c0a8181216.pdf]
